# Supplementary material
Source: PubMed Central journal article supplement (PMC5008425)
Supplement: CJHP-69-294-s001.pdf [file CJHP-69-294-s001.pdf]

## Appendix 1. Search strategies

---

### MEDLINE (via Ovid)

- 1 (adverse drug adj2 (event\$ or reaction\$)).tw.
  - 2 exp "Drug-Related Side Effects and Adverse Reactions"/ or adverse drug outcome.mp.
  - 3 ((medic\$ or drug) adj1 related problem).tw.
  - 4 drug induced problem\$.mp.
  - 5 1 or 2 or 3 or 4
  - 6 hospital\*.mp.
  - 7 exp Hospitalization/ or hospitalization.mp.
  - 8 exp Patient Admission/ or admission.mp.
  - 9 exp Patient Readmission/ or re admission.mp.
  - 10 re hospitalization.mp.
  - 11 inpatient.mp. or exp Inpatients/
  - 12 6 or 7 or 8 or 9 or 10 or 11
  - 13 review.pt.
  - 14 systematic review.mp.
  - 15 overview.mp.
  - 16 13 or 14 or 15
  - 17 5 and 12 and 16
  - 18 exp Child/ not adult/
  - 19 17 not 18
  - 20 limit 19 to yr=" 1995 -Current"
- 

### Cochrane Database of Systematic Reviews and Cochrane Database of Reviews of Effects (via Wiley)

- #1 (adverse drug near/2 (event\* or reaction\*)):ti,ab,kw (Word variations have been searched)
  - #2 MeSH descriptor: [Drug-Related Side Effects and Adverse Reactions] explode all trees
  - #3 (adverse drug n/2 outcome):ti,ab,kw (Word variations have been searched)
  - #4 (drug induced near/2 problem\*):ti,ab,kw
  - #5 (drug related near/2 problem\*):ti,ab,kw
  - #6 #1 or #2 or #3 or #4 or #5
  - #7 MeSH descriptor: [Hospitalization] this term only
  - #8 MeSH descriptor: [Patient Admission] this term only
  - #9 MeSH descriptor: [Patient Readmission] this term only
  - #10 MeSH descriptor: [Inpatients] explode all trees
  - #11 (hospitalization or hospitalisation):ti,ab,kw (Word variations have been searched)
  - #12 (readmission or re admission):ti,ab,kw (Word variations have been searched)
  - #13 (admission\* or inpatient\*):ti,ab,kw (Word variations have been searched)
  - #14 #7 or #8 or #9 or #10 or #11 or #12 or #13
  - #15 #6 and #14
-
